# Supplementary material
Source: publisher figshare collection journal article supplement (https://gsajournals.figshare.com/ndownloader/files/24541664)
Supplement: Supplementary file 1 [file 24541664]

Supplementary figures and tables for:

# HtsRC-mediated accumulation of F-actin regulates ring canal size during *Drosophila melanogaster* oogenesis

Julianne A. Gerdes\*, Katelynn M. Mannix\*, Andrew M. Hudson\*, Lynn Cooley<sup>\*,†,‡,§</sup>

## Supporting Figure 2

Figure S1: Ring canals connecting nurse cells to oocytes retain more F-actin than nurse cell ring canals.

Figure S2: HtsRC persists on actin cables in *cheerio* (Filamin) mutants.

## Supporting Figure 6

Figure S3: HtsRC/F-actin aggregates formation is consistent across various transgenes and can be regulated by Kelch.

Figure S4: Ectopic HtsRC expression drives F-actin aggregate formation independent of Arp2/3 complex activity.

## Supporting Figure 7

Figure S5: HtsRC/F-actin aggregates rarely form at the apical surface in *cheerio* mutants.

## Supporting Discussion section “HtsRC evolution and fecundity”

Figure S6: Predicted HtsRC homologs are present in 28 fly species.

## Supporting Figures 3 and 5

Supplementary Table 1: Means, standard deviations and sample number for data plotted on violin plots in Figure 3 and Figure 5.

## Reagent table

**Figure S1: Ring canals connecting nurse cells to oocytes retain more F-actin than nurse cell ring canals.**

Representative ring canals from several stages labeled with Phalloidin stain (magenta) and Filamin antibody (green). (left) The ring canals connecting pairs of nurse cells in the *hts* mutant never form a robust F-actin cytoskeleton although Filamin localizes normally. (right) The ring canals connecting nurse cells to the oocyte recruit an actin cytoskeleton at later stages (9 and 10) which partially colocalizes with the Filamin stain marking the inner rim. Arrows point to Filamin stain at the inner or outer rim to allow comparison of Filamin and F-actin channels.

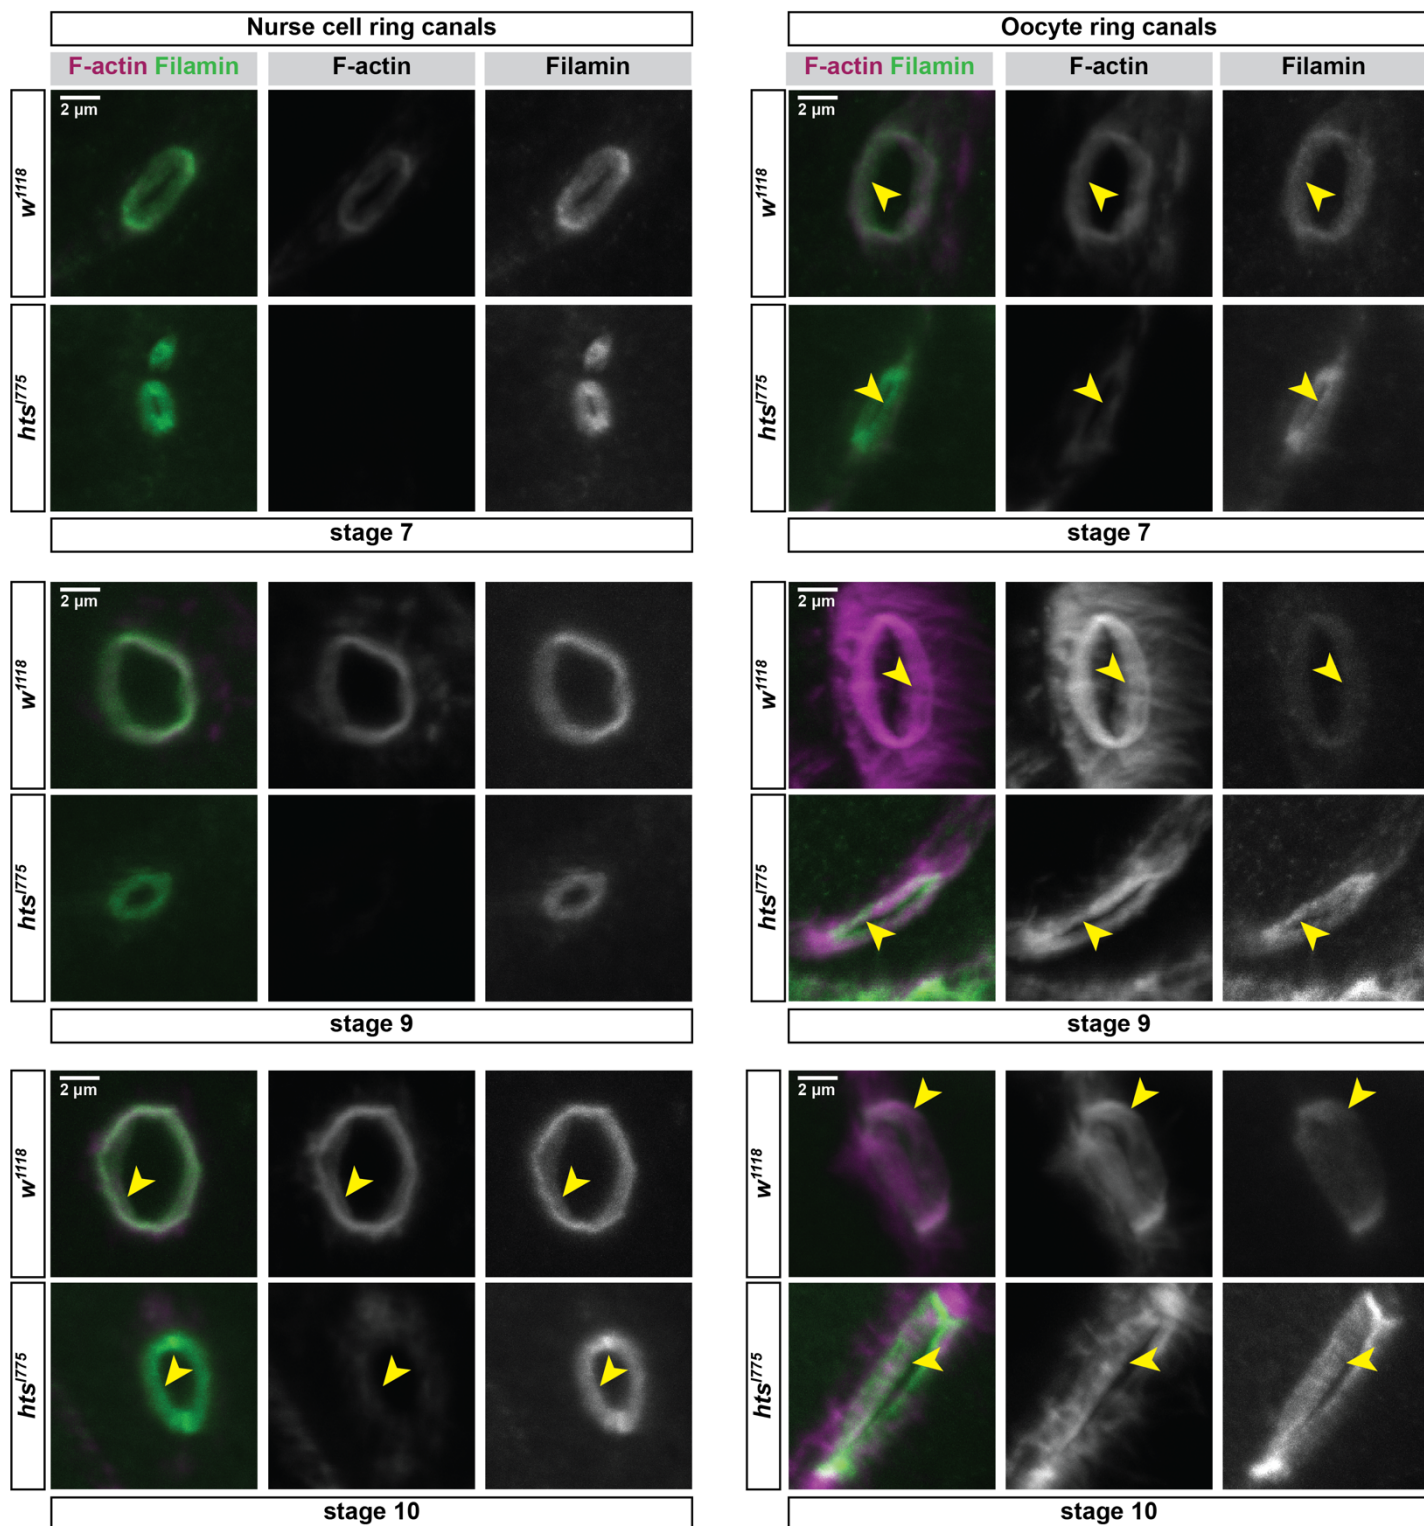

## Figure S2: HtsRC persists on actin cables in *cheerio* (Filamin) mutants.

(A) Diagram of the *cheerio* (Filamin) gene and its protein products. Two independent transcription start sites promote the transcription of a full length Filamin (Filamin240) and a short Filamin (Filamin90). *cher*<sup>1</sup> is an allele with no known lesion that does not express detectable Filamin protein in the germline or somatic follicle cells. *cher*<sup>M113</sup> and *cher*<sup>M919</sup> were a gift from the David Ish-Horowicz lab. *cher*<sup>M113</sup> causes a nonsense mutation in the actin binding domain, while *cher*<sup>M919</sup> contains a point mutation which converts an AG to TG and eliminates a splice acceptor. *cher*<sup>M107480-GFSTF.0</sup> (used in Figure 2) is an intronic insertion allele from the Mimic collection which has been swapped for a GFP containing cassette. GFP protein is inserted in the hinge of Filamin240 and roughly 70% of Filamin protein in ovary lysates contains GFP (results not shown). (B) HtsRC (green) and F-actin (magenta) stain of *w*<sup>1118</sup> control compared to three *cheerio* mutants. HtsRC localizes to both actin cables and ring canals in wild type and to cables in *cher* mutants. Antibody to the C-terminus of Filamin (not included in the merge) labels ring canals but does not stain actin cables.

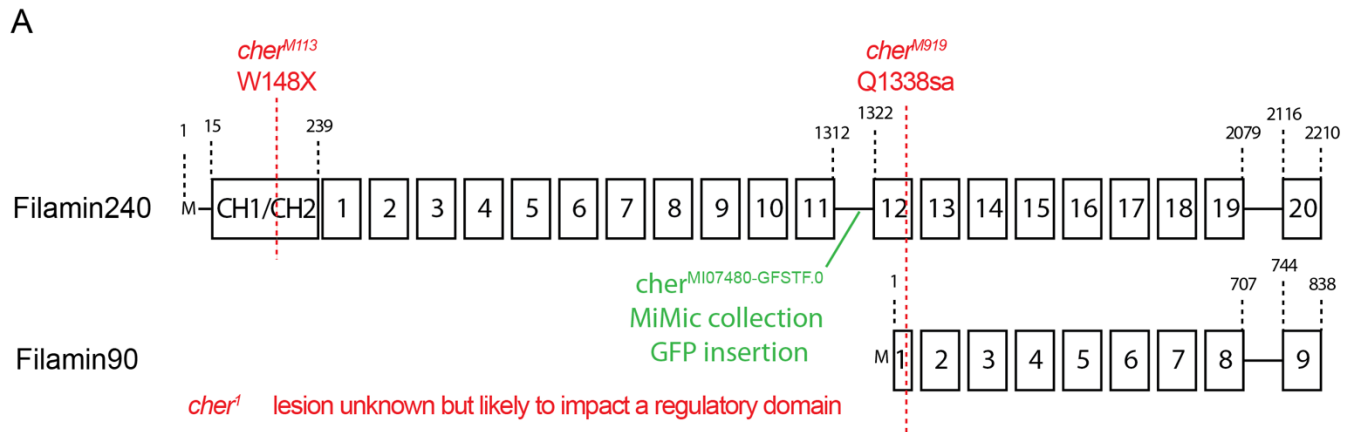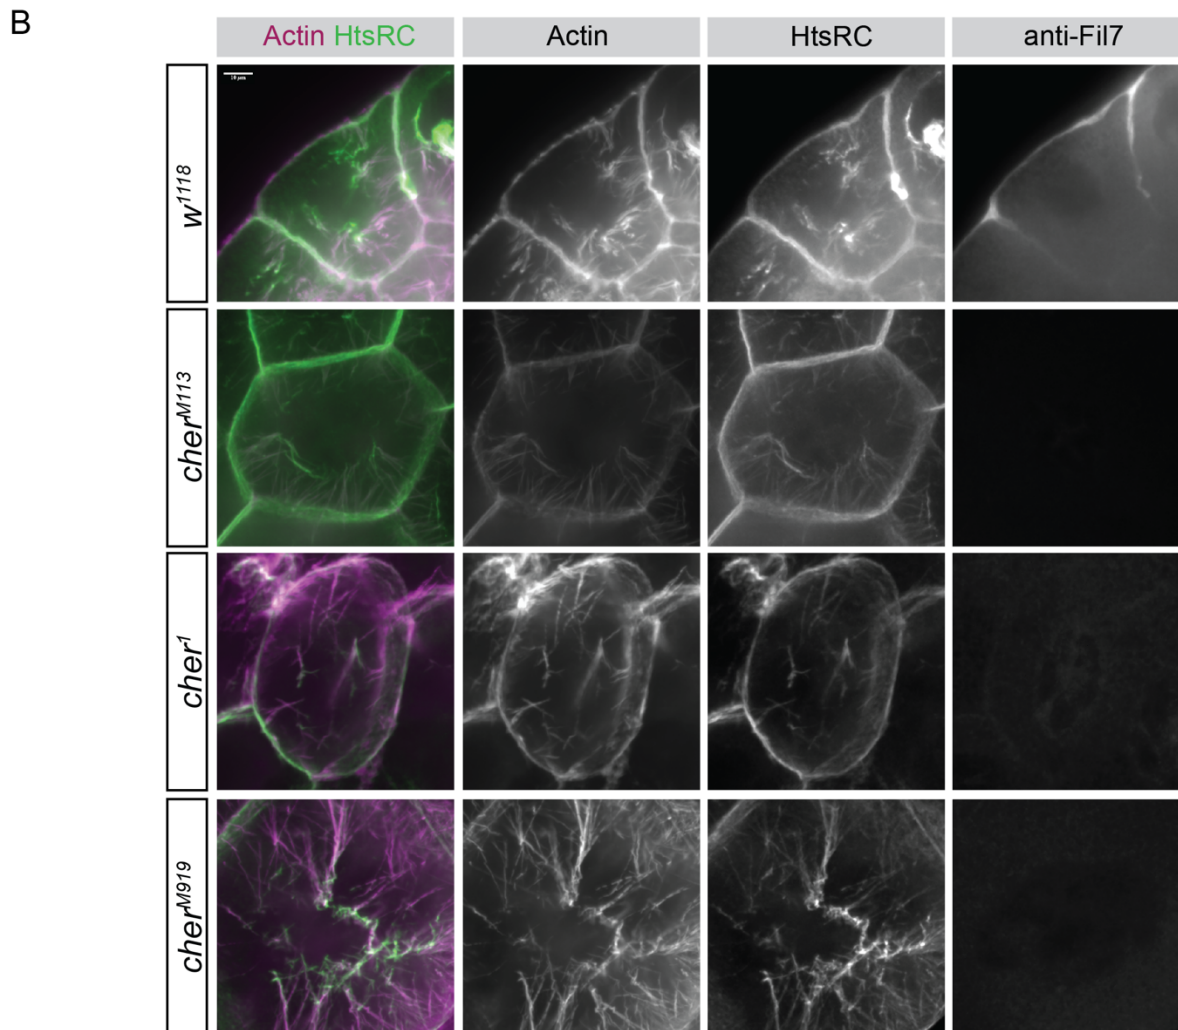



**Figure S3: HtsRC/F-actin aggregates formation is consistent across various transgenes and can be regulated by Kelch.** (A-E) View of somatic follicle cells from the basal end in *w<sup>1118</sup>* control (A) compared with four different *ovhts* transgenes. (F-J) View of somatic follicle cells from the side with the basal end oriented downward and the apical end/germline oriented upward. (K-M) *UASh-ovhts::GFP-htsN4* transgene (same as C, H) driven in somatic follicle cells under the control of the hindsight-Gal4 driver. An mCherry control (K), mCherry::Kelch (L) or unregulated Kelch (M) is coexpressed with the same driver. (N-Q) Quantification of aggregate/foci features for aggregates in controls or the two Kelch overexpression conditions: number of aggregates per egg chamber region (N), average aggregate size (O), total summed aggregate area per egg chamber region (P), and total summed aggregate fluorescence (Q). Individual data points represent measurements from individual egg chambers. Significance was determined using one-way ANOVA, Tukey's multiple comparison test. significance thresholds as follows:  $p < 0.05$  (\*);  $p < 0.0001$  (\*\*\*\*).

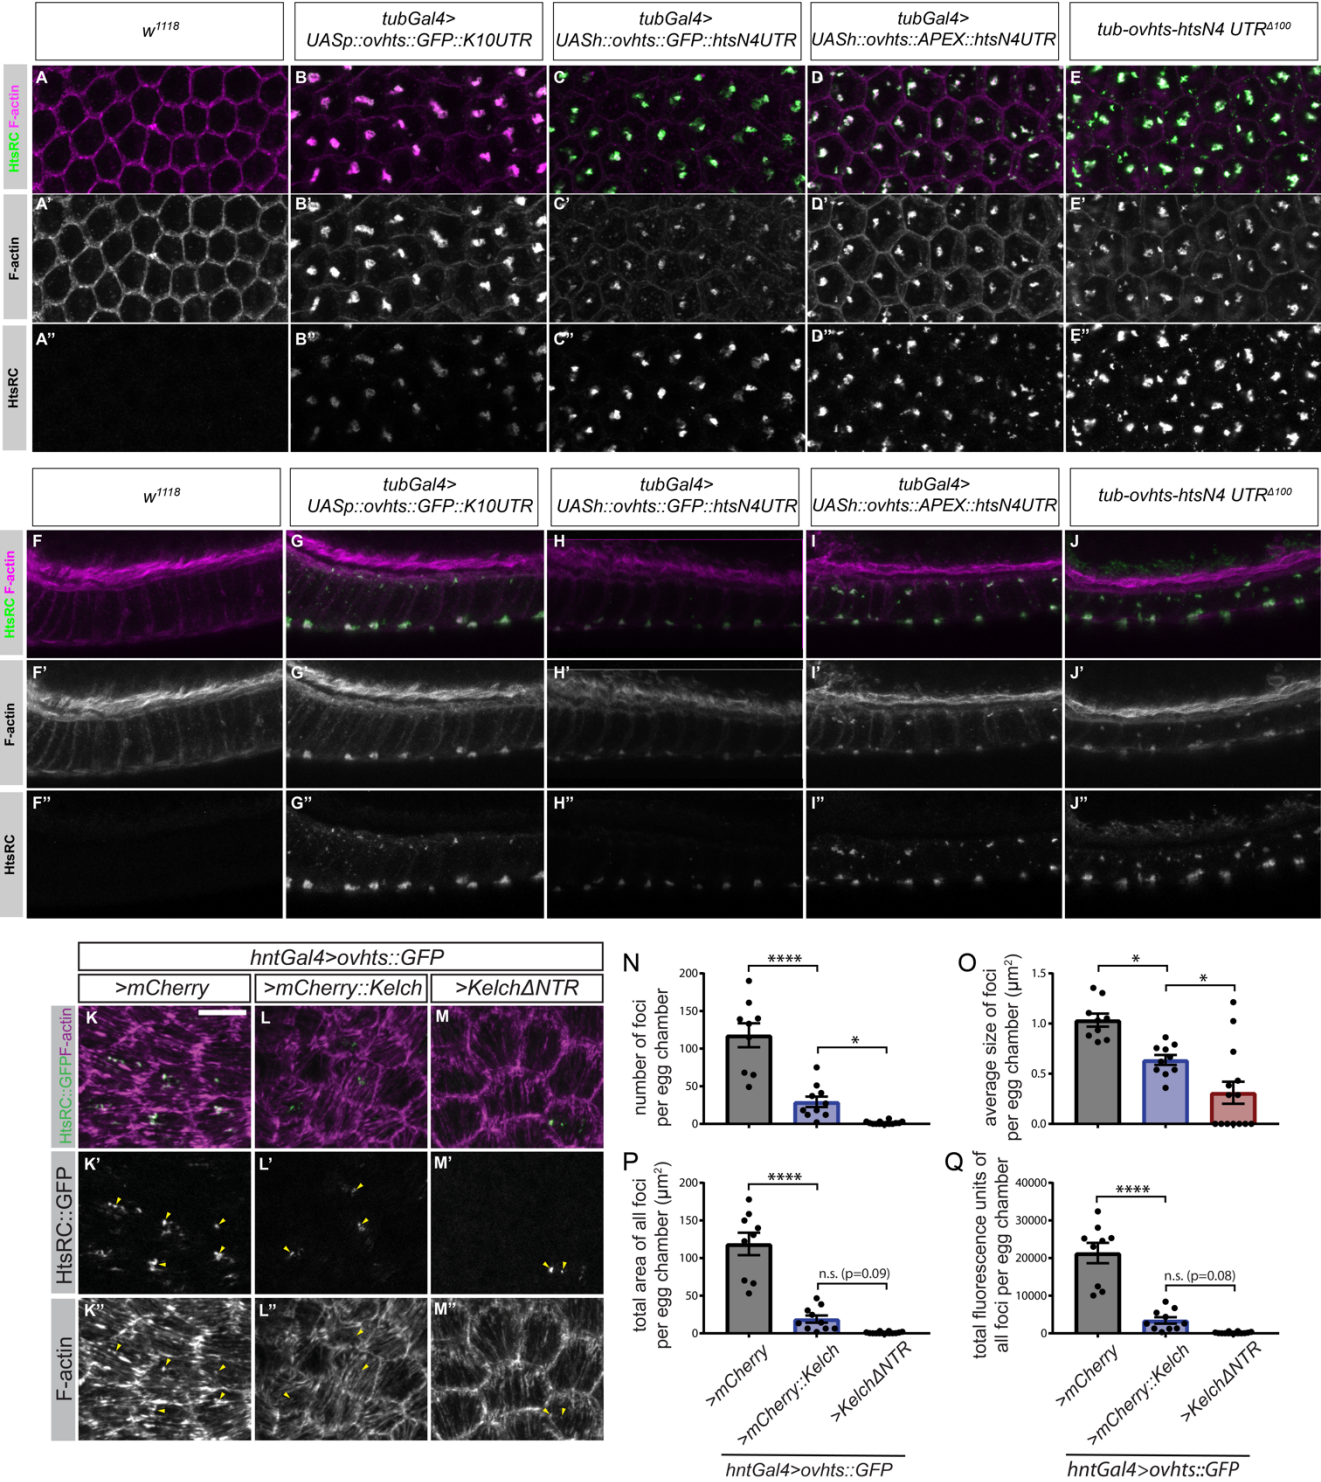



**Figure S4: Ectopic HtsRC expression drives F-actin aggregate formation independent of Arp2/3 complex activity.**

Heatshocks were performed on flies heterozygous for *FRT40A Tubulin-Gal80* and either a wildtype control *FRT40A* chromosome or an *FRT40A* chromosome containing a mutant allele. Clones expressing two copies of the control allele or two copies of the mutant allele were marked by the expression of *CD8::GFP* (blue) and *HtsRC::V5::APEX* (green) driven by *tubulin-Gal4* expression. Neighboring cells (no GFP) contained either one or two copies of *tubulin-Gal80* and did not express GFP or HtsRC protein. Samples were also stained with Phalloidin. (A) Control clone (B) *ArpC1<sup>Q29sd</sup>* mutant clone (C) *ArpC4<sup>SH1036</sup>* mutant clone. Quantifications were performed on HtsRC aggregates from regions taken from GFP positive clones (D-F). Regions were defined by a 24.3 micron by 24.3 micron square in the xy plane, but had a variable number of z-slices depending on the thickness of the somatic epithelium. Mean density (fluorescent intensity divided by volume) intensities for both HtsRC (D) and F-actin (E) channels were calculated for aggregates within each region. Total volume occupied by aggregates (F) and total HtsRC intensity were also determined for each region. Significance was determined for each experiment using a one-way ANOVA and Tukey's multiple comparison tests. P-value summaries for the multiple comparison tests are displayed on graphs, with  $p < 0.05$  indicated by an \*. ANOVA P values are as follows: (D) 0.0515, (E) 0.808, (F) 0.7287, and (G) 0.1512.

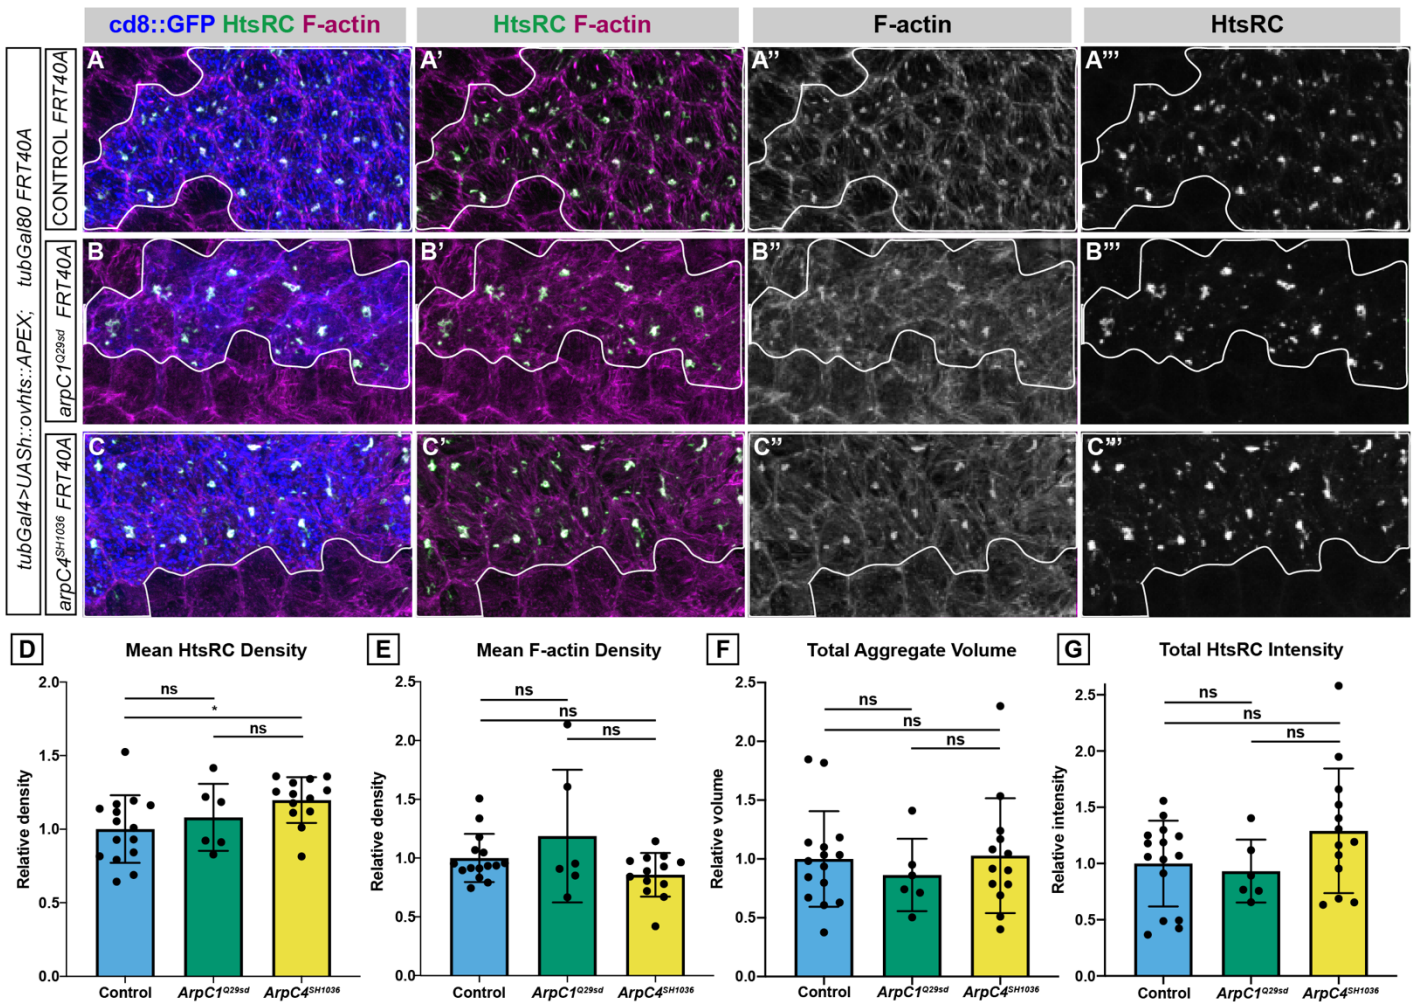

**Figure S5: HtsRC/F-actin aggregates rarely form at the apical surface in *cheerio* mutants.** Aggregate location within follicle cells was determined in Imaris for all aggregates within three regions of interest (regions p, q, and r; 24x24 micron squares) per egg chamber. Z-position at the center of mass (based on HtsRC intensity) for each aggregate was used as a proxy for the location of the entire aggregate or cluster of aggregates; aggregates in close proximity were reported by Imaris as a single aggregate. The position of the nuclei was calculated using the center of mass for DAPI stain and used to normalize the relative aggregate position between samples. Although the x and y dimensions of the regions of interest were fixed, the z dimension varied with the depth of the follicle cell layer.

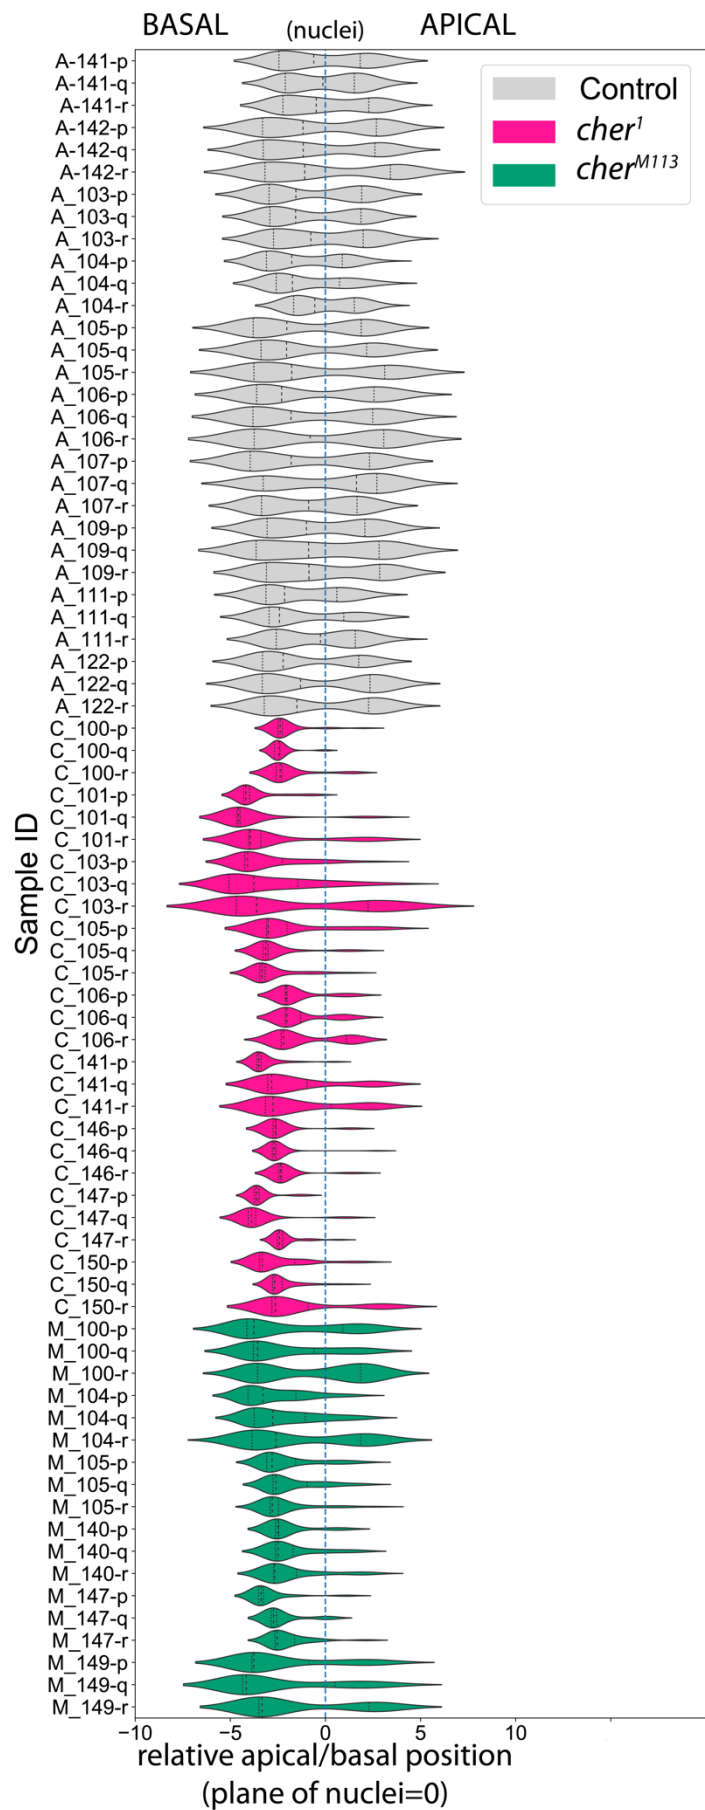

**Figure S6 (on following page): Predicted HtsRC homologs are present in 28 fly species.** Clustal Omega alignment of HtsRC proteins from 26 *Drosophila* species as well as *Musca domestica* and *Glossina palpalis*. Gaps are indicated by blank space. Residue conservation within this group is indicated by black boxes under the alignment. Conserved residues are colored according to the Clustal X color scheme with non-conserved residues left white: hydrophobic (blue), positive charge (red), negative charge (magenta), polar (green), cysteines (pink), glycines (orange), prolines (yellow), and aromatics (cyan). The site of Ovhts polyprotein cleavage and Kelch binding found in *D. melanogaster* are indicated by black outlines. *D. melanogaster* sequence is indicated by a red dashed line. Species in alignment (in order) are as follows: *D. arizonae*, *D. biarmipes*, *D. bipectinata*, *D. busckii*, *D. elegans*, *D. erecta*, *D. eugracilis*, *D. ficusphila*, *D. grimshawi*, *D. hydei*, *D. kikkawai*, *D. melanogaster*, *D. miranda*, *D. mojavensis*, *D. navojoa*, *D. persimilis*, *D. pseudoobscura*, *D. rhopaloa*, *D. sechellia*, *D. serrata*, *D. simulans*, *D. suzukii*, *D. takahashii*, *D. virilis*, *D. willistoni*, *D. yakuba*, *G. palpalis*, *M. domestica*.



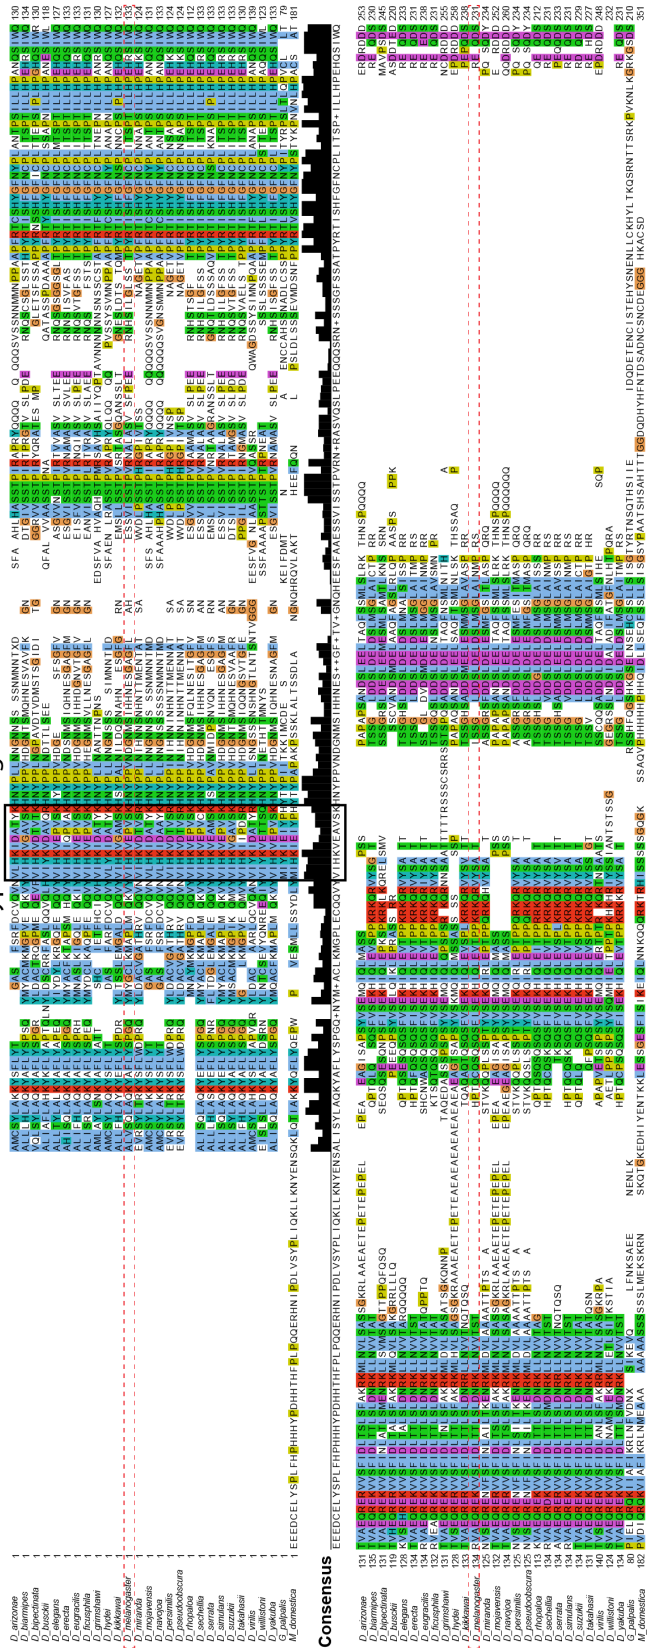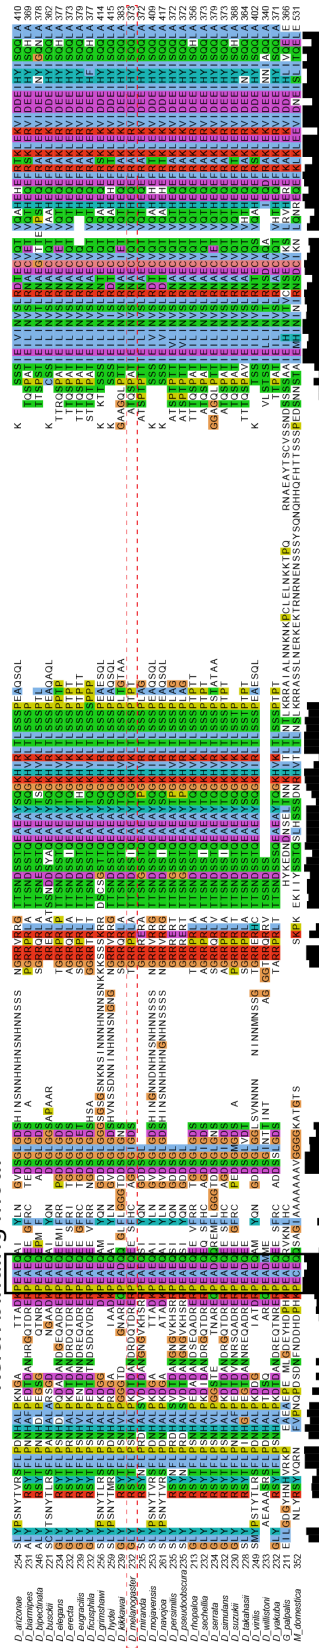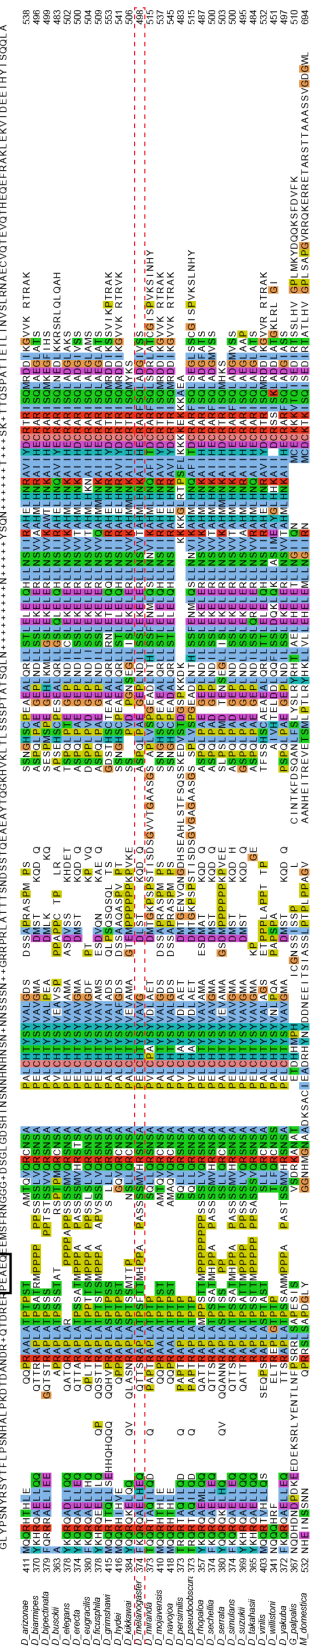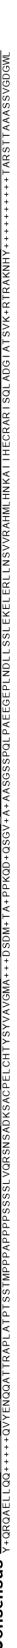

**Supplementary Table 1:**

Means, standard deviations and sample number for data plotted on violin plots in Figure 3 and Figure 5.

| Figure 3C and D (ring canal diameter) |                          |       |               |      |               |                |
|---------------------------------------|--------------------------|-------|---------------|------|---------------|----------------|
| Genotype                              | RC type                  | Stage | Mean diameter | SD   | N ring canals | N egg chambers |
| <i>w<sup>1118</sup></i>               | nurse cell to nurse cell | 2     | 1.72          | 0.43 | 22            | 2              |
|                                       |                          | 3     | 2.25          | 0.43 | 33            | 3              |
|                                       |                          | 4     | 2.95          | 0.52 | 55            | 5              |
|                                       |                          | 5     | 3.79          | 0.39 | 77            | 7              |
|                                       |                          | 6     | 4.31          | 0.40 | 44            | 4              |
|                                       |                          | 7     | 4.52          | 0.44 | 55            | 5              |
|                                       |                          | 8     | 5.13          | 0.68 | 34            | 4              |
|                                       |                          | 9     | 5.85          | 0.52 | 42            | 4              |
|                                       |                          | 10a   | 6.53          | 0.86 | 34            | 4              |
|                                       |                          | 10b   | 8.99          | 1.15 | 22            | 2              |
| <i>hts<sup>I775fs</sup></i>           | nurse cell to nurse cell | 2     | 1.41          | 0.26 | 38            | 4              |
|                                       |                          | 3     | 1.89          | 0.39 | 22            | 2              |
|                                       |                          | 4     | 2.26          | 0.46 | 55            | 5              |
|                                       |                          | 5     | 2.30          | 0.66 | 44            | 4              |
|                                       |                          | 6     | 2.86          | 0.74 | 31            | 3              |
|                                       |                          | 7     | 2.93          | 0.85 | 33            | 3              |
|                                       |                          | 8     | 3.18          | 1.09 | 33            | 3              |
|                                       |                          | 9     | 4.13          | 1.09 | 44            | 4              |
|                                       |                          | 10a   | 4.60          | 1.44 | 22            | 2              |
|                                       |                          | 10b   | 5.22          | 2.35 | 33            | 3              |
| <i>w<sup>1118</sup></i>               | oocyte to nurse cell     | 2     | 2.22          | 0.59 | 8             | 2              |
|                                       |                          | 3     | 2.86          | 0.65 | 12            | 3              |
|                                       |                          | 4     | 3.39          | 0.65 | 19            | 5              |
|                                       |                          | 5     | 4.31          | 0.72 | 28            | 7              |
|                                       |                          | 6     | 4.84          | 0.52 | 16            | 4              |
|                                       |                          | 7     | 5.14          | 0.51 | 20            | 5              |
|                                       |                          | 8     | 6.01          | 0.95 | 12            | 3              |
|                                       |                          | 9     | 6.74          | 0.88 | 16            | 4              |
|                                       |                          | 10a   | 7.51          | 1.72 | 12            | 3              |
|                                       |                          | 10b   | 10.99         | 2.37 | 6             | 2              |
| <i>hts<sup>I775fs</sup></i>           | oocyte to nurse cell     | 2     | 2.00          | 0.53 | 16            | 4              |
|                                       |                          | 3     | 2.81          | 0.50 | 8             | 2              |
|                                       |                          | 4     | 3.41          | 0.67 | 20            | 5              |
|                                       |                          | 5     | 4.57          | 1.03 | 16            | 4              |
|                                       |                          | 6     | 5.01          | 0.99 | 12            | 3              |
|                                       |                          | 7     | 5.07          | 1.20 | 12            | 3              |
|                                       |                          | 8     | 5.92          | 1.55 | 12            | 3              |
|                                       |                          | 9     | 8.46          | 5.31 | 16            | 4              |
|                                       |                          | 10a   | 11.29         | 2.86 | 8             | 2              |
|                                       |                          | 10b   | 10.82         | 3.96 | 12            | 3              |

| Figure 5G (ring canal diameter)                                         |       |               |      |               |                |
|-------------------------------------------------------------------------|-------|---------------|------|---------------|----------------|
| Condition                                                               | Stage | Mean diameter | SD   | N ring canals | N egg chambers |
| <b>w<sup>1118</sup> control</b>                                         | 2     | 1.74          | 0.57 | 25            | 2              |
|                                                                         | 3     | 1.87          | 0.54 | 28            | 2              |
|                                                                         | 5     | 3.55          | 0.78 | 73            | 5              |
|                                                                         | 7     | 5.00          | 0.89 | 15            | 1              |
|                                                                         | 9     | 8.18          | 1.16 | 75            | 5              |
|                                                                         | 10A   | 11.30         | 2.39 | 58            | 4              |
|                                                                         | 10B   | 13.83         | 1.83 | 30            | 2              |
| <b>HtsRC overexpression<br/>(<i>matGal4</i> &gt; <i>ovhts::GFP</i>)</b> | 2     | 2.29          | 0.62 | 26            | 2              |
|                                                                         | 3     | 3.14          | 0.67 | 29            | 2              |
|                                                                         | 5     | 4.62          | 1.12 | 30            | 2              |
|                                                                         | 7     | 7.50          | 1.60 | 39            | 3              |
|                                                                         | 9     | 11.41         | 1.97 | 65            | 5              |
|                                                                         | 10A   | 15.28         | 3.18 | 19            | 2              |
|                                                                         | 10B   | 22.20         | 4.18 | 22            | 2              |



Reagent Table; Gerdes et al.

| Data type                                                                                             | Experimental species                        | Symbol/name used in publication                                      | Source – public                                                                   | Source – published                                               | Source – unpublished                                                             | Identifiers                                                                                    | New reagent                                                                                                                                                                                                                                                                | Comments                                                                                                               |
|-------------------------------------------------------------------------------------------------------|---------------------------------------------|----------------------------------------------------------------------|-----------------------------------------------------------------------------------|------------------------------------------------------------------|----------------------------------------------------------------------------------|------------------------------------------------------------------------------------------------|----------------------------------------------------------------------------------------------------------------------------------------------------------------------------------------------------------------------------------------------------------------------------|------------------------------------------------------------------------------------------------------------------------|
| Data type (mandatory). Duplicate rows as needed. Order is flexible, but row titles must be preserved. | Experimental species (mandatory, "NA" okay) | Symbol/name used in publication (mandatory)                          | Source – public (stock center, company, data repository) (one of D,E,F mandatory) | Source – published (PMID or this paper) (one of D,E,F mandatory) | Source – unpublished (description, incl. lab of origin) (one of D,E,F mandatory) | Identifiers (format as ID, source identifier) Separate multiple entries with semi-colon, space | New reagent (mandatory for new entities) Description, progenitor(s)                                                                                                                                                                                                        | Comments (optional) Genotypes, purpose of reagent, additional information                                              |
| antibody                                                                                              | NA                                          | HtsRC antibody                                                       | Developmental Studies Hybridoma Bank                                              |                                                                  |                                                                                  | RRID:AB_528289                                                                                 |                                                                                                                                                                                                                                                                            | Mouse monoclonal anti-Hts (HtsRC 4B); 1:10 dilution                                                                    |
| antibody                                                                                              | NA                                          | Flamin antibody                                                      |                                                                                   | PMID:10556087                                                    |                                                                                  | RRID:AB_2569614                                                                                |                                                                                                                                                                                                                                                                            | Rat polyclonal anti-Flamin (CFIL 7); 1:500 dilution                                                                    |
| antibody                                                                                              | NA                                          | Goat anti-mouse Alexa Fluor 633                                      | Thermo Fisher Scientific                                                          |                                                                  |                                                                                  | RRID:AB_2535719                                                                                |                                                                                                                                                                                                                                                                            | Goat anti-mouse IgG Secondary Antibody, Alexa Fluor 633; 1:500 dilution                                                |
| antibody                                                                                              | NA                                          | Goat anti-mouse IgG Secondary Antibody, Alexa Fluor 647; 1:500       | Thermo Fisher Scientific                                                          |                                                                  |                                                                                  | RRID:AB_2535804                                                                                |                                                                                                                                                                                                                                                                            | Goat anti-mouse IgG Secondary Antibody, Alexa Fluor 647; 1:500 dilution                                                |
| antibody                                                                                              | NA                                          | Goat anti-rat IgG Secondary Antibody, Alexa Fluor 488; 1:500         | Thermo Fisher Scientific                                                          |                                                                  |                                                                                  | RRID:AB_2534074                                                                                |                                                                                                                                                                                                                                                                            | Goat anti-rat IgG Secondary Antibody, Alexa Fluor 488; 1:500 dilution                                                  |
| antibody                                                                                              | NA                                          | TRITC-Phalloidin                                                     | Sigma-Aldrich                                                                     |                                                                  |                                                                                  | RRID:AB_2315148                                                                                |                                                                                                                                                                                                                                                                            | 1:200 dilution                                                                                                         |
| other                                                                                                 | NA                                          | DAPI stain                                                           |                                                                                   |                                                                  |                                                                                  |                                                                                                |                                                                                                                                                                                                                                                                            | 1:50,000 dilution                                                                                                      |
| genetic reagent (in whole organism)                                                                   | Drosophila melanogaster                     | Wild type; w <sup>1118</sup>                                         | Bloomington Drosophila Stock Center                                               |                                                                  |                                                                                  | RRID:BDSC_3605                                                                                 |                                                                                                                                                                                                                                                                            |                                                                                                                        |
| genetic reagent (in whole organism)                                                                   | Drosophila melanogaster                     | matGal4                                                              | Bloomington Drosophila Stock Center                                               |                                                                  |                                                                                  | BDSC_7063; FB:FBi0016914                                                                       |                                                                                                                                                                                                                                                                            | w <sup>1118</sup> ; P[w <sup>1118</sup> +mC]-mata4-GAL-VP16/V37                                                        |
| genetic reagent (in whole organism)                                                                   | Drosophila melanogaster                     | hntGal4                                                              |                                                                                   | PMID:12814552                                                    |                                                                                  | FB:FBaI0130627                                                                                 |                                                                                                                                                                                                                                                                            | Gift from Mary Baylies lab                                                                                             |
| genetic reagent (in whole organism)                                                                   | Drosophila melanogaster                     | tubGal4                                                              | Bloomington Drosophila Stock Center                                               |                                                                  |                                                                                  | BDSC_5138; FB:FBi0012687                                                                       |                                                                                                                                                                                                                                                                            |                                                                                                                        |
| genetic reagent (in whole organism)                                                                   | Drosophila melanogaster                     | htr <sup>1</sup> LP1; tubulinGal80 FRT40A; UAS-mCD8::GFP tubulinGal4 |                                                                                   | this paper                                                       |                                                                                  |                                                                                                | Component stocks/insertions: RRID:BDSC_5; FB:FBi0002044; RRID:BDSC_5192; RRID:BDSC_30030;                                                                                                                                                                                  |                                                                                                                        |
| genetic reagent (in whole organism)                                                                   | Drosophila melanogaster                     | cher1                                                                |                                                                                   | PMID:9093858                                                     |                                                                                  | FB:FBaI0060473                                                                                 |                                                                                                                                                                                                                                                                            |                                                                                                                        |
| genetic reagent (in whole organism)                                                                   | Drosophila melanogaster                     | cherM113                                                             |                                                                                   |                                                                  | David Ish-Horowitz lab                                                           |                                                                                                | This work/Laboratory of D. Ish-Horowitz; mutations generated on FRT82 chromosome by EMS. Allele was generated as an extension of the work done in Hayashi et al 2014 but not published.                                                                                    | Gift of David Ish-Horowitz.                                                                                            |
| genetic reagent (in whole organism)                                                                   | Drosophila melanogaster                     | cherM919                                                             |                                                                                   |                                                                  | David Ish-Horowitz lab                                                           |                                                                                                | This work/Laboratory of D. Ish-Horowitz; mutations generated on FRT82 chromosome by EMS. Allele was generated as an extension of the work done in Hayashi et al 2014 but not published.                                                                                    | Gift of David Ish-Horowitz.                                                                                            |
| genetic reagent (in whole organism)                                                                   | Drosophila melanogaster                     | htr1755f                                                             |                                                                                   | PMID:30559276                                                    |                                                                                  | FB:FBaI0345602                                                                                 |                                                                                                                                                                                                                                                                            |                                                                                                                        |
| genetic reagent (in whole organism)                                                                   | Drosophila melanogaster                     | htrR913s                                                             |                                                                                   | PMID:30559276                                                    |                                                                                  | FB:FBaI0345601                                                                                 |                                                                                                                                                                                                                                                                            |                                                                                                                        |
| genetic reagent (in whole organism)                                                                   | Drosophila melanogaster                     | UASp-mCherry                                                         |                                                                                   | PMID:22428051                                                    |                                                                                  | FB:FBaI0284922                                                                                 |                                                                                                                                                                                                                                                                            |                                                                                                                        |
| genetic reagent (in whole organism)                                                                   | Drosophila melanogaster                     | UASp-TAPmCherry-Kelch                                                |                                                                                   | PMID:26384358                                                    |                                                                                  | FB:FBaI0283122                                                                                 |                                                                                                                                                                                                                                                                            |                                                                                                                        |
| genetic reagent (in whole organism)                                                                   | Drosophila melanogaster                     | UASp-Kelch-deltaNTR                                                  |                                                                                   | PMID:30559276                                                    |                                                                                  | FB:FBaI0345599                                                                                 |                                                                                                                                                                                                                                                                            |                                                                                                                        |
| genetic reagent (in whole organism)                                                                   | Drosophila melanogaster                     | tubulin-ovhts-hsN4UtrDelta100                                        |                                                                                   | PMID:24677508                                                    |                                                                                  | FB:FBaI0301360                                                                                 |                                                                                                                                                                                                                                                                            | Tubulin direct drive construct missing region of 3'UTR required for Swallow dependent localization at at oocyte cortex |
| genetic reagent (in whole organism)                                                                   | Drosophila melanogaster                     | UASH-Ovhts::GFP-hsN4Utr                                              |                                                                                   | PMID:17215303                                                    |                                                                                  | FB:FBaI0212988                                                                                 |                                                                                                                                                                                                                                                                            | Contains UAS promoter with ovhts/hisN4 3'UTR sequence in place of typical 3'UTR                                        |
| genetic reagent (in whole organism)                                                                   | Drosophila melanogaster                     | UASH-Ovhts::GFP-K18Utr                                               |                                                                                   | this paper                                                       |                                                                                  |                                                                                                | ovhts::GFP PCR amplified from UASH-ovhts::GFP-hsN4Utr construct and inserted into pDONR201; Insert was then swapped into pPW-attB using Gateway recombination. Resulting plasmid was transformed into a strain containing the attP2 landing site on chromosome III (88A4). |                                                                                                                        |
| genetic reagent (in whole organism)                                                                   | Drosophila melanogaster                     | UASH-Ovhts::V5::APEX-hsN4Utr                                         |                                                                                   | this paper                                                       |                                                                                  |                                                                                                | APEX was PCR amplified from pDNA3-mito-APEX using a primer containing V5 tag sequence. Resulting PCR product was restriction cloned into UASH-ovhts::GFP (hsN4Utr) in frame in the place of GFP. Plasmid was inserted using p-element insertion                            |                                                                                                                        |
| genetic reagent (in whole organism)                                                                   | Drosophila melanogaster                     | htr Df. w <sup>1118</sup> ; Df(2R)BSC135/CyO                         | Bloomington Drosophila Stock Center                                               |                                                                  |                                                                                  | BDSC_9423; FB:FBaI0044866                                                                      |                                                                                                                                                                                                                                                                            |                                                                                                                        |
| genetic reagent (in whole organism)                                                                   | Drosophila melanogaster                     | cher-M07480-GFSTF.0                                                  | Bloomington Drosophila Stock Center                                               |                                                                  |                                                                                  | BDSC_60261; FB:FBaI0314454                                                                     |                                                                                                                                                                                                                                                                            |                                                                                                                        |
| genetic reagent (in whole organism)                                                                   | Drosophila melanogaster                     | ArpC1-Q25SD FRT40A                                                   | Bloomington Drosophila Stock Center                                               |                                                                  |                                                                                  | BDSC_9137; FB:FBaI0135790                                                                      |                                                                                                                                                                                                                                                                            |                                                                                                                        |
| genetic reagent (in whole organism)                                                                   | Drosophila melanogaster                     | ArpC4-SH1036 FRT40A                                                  | Bloomington Drosophila Stock Center                                               |                                                                  |                                                                                  | BDSC_29488; FB:FBaI0321477                                                                     |                                                                                                                                                                                                                                                                            |                                                                                                                        |
| genetic reagent (in whole organism)                                                                   | Drosophila melanogaster                     | isogenized neoFRT40A                                                 |                                                                                   | PMID:8404527                                                     |                                                                                  | FB:FBi0002071                                                                                  |                                                                                                                                                                                                                                                                            | Gift of Tian Xu                                                                                                        |
| gene (source not applicable)                                                                          | Drosophila melanogaster                     | htr                                                                  | NA                                                                                | NA                                                               | NA                                                                               | FB:FBgn0263391                                                                                 |                                                                                                                                                                                                                                                                            |                                                                                                                        |
| gene (source not applicable)                                                                          | Drosophila melanogaster                     | cherio                                                               | NA                                                                                | NA                                                               | NA                                                                               | FB:FBgn0014141                                                                                 |                                                                                                                                                                                                                                                                            |                                                                                                                        |
| gene (source not applicable)                                                                          | Drosophila melanogaster                     | kelch                                                                | NA                                                                                | NA                                                               | NA                                                                               | FB:FBgn0001301                                                                                 |                                                                                                                                                                                                                                                                            |                                                                                                                        |
| gene (source not applicable)                                                                          | Drosophila melanogaster                     | ArpC1                                                                | NA                                                                                | NA                                                               | NA                                                                               | FB:FBgn0001961                                                                                 |                                                                                                                                                                                                                                                                            |                                                                                                                        |
| gene (source not applicable)                                                                          | Drosophila melanogaster                     | ArpC4                                                                | NA                                                                                | NA                                                               | NA                                                                               | FB:FBgn0284255                                                                                 |                                                                                                                                                                                                                                                                            |                                                                                                                        |
| software, algorithm                                                                                   | NA                                          | ImageJ/Fiji                                                          | NIH                                                                               |                                                                  |                                                                                  |                                                                                                |                                                                                                                                                                                                                                                                            | <a href="https://fiji.sc/">https://fiji.sc/</a>                                                                        |
| software, algorithm                                                                                   | NA                                          | Imaris 9.3                                                           | Bitplane                                                                          |                                                                  |                                                                                  |                                                                                                |                                                                                                                                                                                                                                                                            | <a href="https://www.bitplane.com/">https://www.bitplane.com/</a>                                                      |
| software, algorithm                                                                                   | NA                                          | Prism 8                                                              | GraphPad                                                                          |                                                                  |                                                                                  |                                                                                                |                                                                                                                                                                                                                                                                            | <a href="https://www.graphpad.com/scientificsoftware/prism/">https://www.graphpad.com/scientificsoftware/prism/</a>    |
| software, algorithm                                                                                   | NA                                          | Jalview                                                              |                                                                                   | PMID:19151095                                                    |                                                                                  |                                                                                                |                                                                                                                                                                                                                                                                            | <a href="http://www.jalview.org/">http://www.jalview.org/</a>                                                          |
| software, algorithm                                                                                   | NA                                          | Jupyter Notebook                                                     | Anaconda                                                                          |                                                                  |                                                                                  |                                                                                                |                                                                                                                                                                                                                                                                            | <a href="http://www.anaconda.com/">http://www.anaconda.com/</a>                                                        |
| software, algorithm                                                                                   | NA                                          | NCBI Blast                                                           | NIH                                                                               |                                                                  |                                                                                  |                                                                                                |                                                                                                                                                                                                                                                                            | <a href="https://blast.ncbi.nlm.nih.gov/">https://blast.ncbi.nlm.nih.gov/</a>                                          |
| software, algorithm                                                                                   | NA                                          | Vectorbase                                                           |                                                                                   | PMID:25510499                                                    |                                                                                  |                                                                                                |                                                                                                                                                                                                                                                                            | <a href="https://www.vectorbase.org/blast">https://www.vectorbase.org/blast</a>                                        |
| software, algorithm                                                                                   | NA                                          | SPOT-Disorder-Single application                                     |                                                                                   | PMID:30395465                                                    |                                                                                  |                                                                                                |                                                                                                                                                                                                                                                                            |                                                                                                                        |
| software, algorithm                                                                                   | NA                                          | MetaDisorder (GeneSilo)                                              |                                                                                   | PMID:22624656                                                    |                                                                                  |                                                                                                |                                                                                                                                                                                                                                                                            | <a href="http://genesilo.clinicaldisorder/">http://genesilo.clinicaldisorder/</a>                                      |
| recombinant DNA reagent                                                                               | NA                                          | pUASH-ovhts-GFP                                                      |                                                                                   | PMID:17215303                                                    |                                                                                  |                                                                                                |                                                                                                                                                                                                                                                                            |                                                                                                                        |
| recombinant DNA reagent                                                                               | NA                                          | pCDNA3-mito-APEX                                                     |                                                                                   | PMID:23371551                                                    |                                                                                  |                                                                                                | Addgene Plasmid #42607                                                                                                                                                                                                                                                     |                                                                                                                        |
| recombinant DNA reagent                                                                               | NA                                          | pPW-attB (gateway vector)                                            |                                                                                   |                                                                  | Lab of Michael Buszczak, UT Southwestern                                         |                                                                                                |                                                                                                                                                                                                                                                                            |                                                                                                                        |
| recombinant DNA reagent                                                                               | NA                                          | pDONR201 (gateway vector)                                            | Thermo Fisher Scientific                                                          |                                                                  |                                                                                  |                                                                                                |                                                                                                                                                                                                                                                                            |                                                                                                                        |
| gene (source not applicable)                                                                          | D. arizonae                                 | predicted HtsRC homolog                                              |                                                                                   |                                                                  |                                                                                  | XM_018011272                                                                                   |                                                                                                                                                                                                                                                                            |                                                                                                                        |
| gene (source not applicable)                                                                          | D. biarmipes                                | predicted HtsRC homolog                                              |                                                                                   |                                                                  |                                                                                  | XM_017057880                                                                                   |                                                                                                                                                                                                                                                                            |                                                                                                                        |
| gene (source not applicable)                                                                          | D. bipunctata                               | predicted HtsRC homolog                                              |                                                                                   |                                                                  |                                                                                  | XM_017050448.2                                                                                 |                                                                                                                                                                                                                                                                            |                                                                                                                        |
| gene (source not applicable)                                                                          | D. busckii                                  | predicted HtsRC homolog                                              |                                                                                   |                                                                  |                                                                                  | XM_017050448.2                                                                                 |                                                                                                                                                                                                                                                                            |                                                                                                                        |
| gene (source not applicable)                                                                          | D. elegans                                  | predicted HtsRC homolog                                              |                                                                                   |                                                                  |                                                                                  | XM_017050448.2                                                                                 |                                                                                                                                                                                                                                                                            |                                                                                                                        |
| gene (source not applicable)                                                                          | D. erecta                                   | predicted HtsRC homolog                                              |                                                                                   |                                                                  |                                                                                  | XM_018166883                                                                                   |                                                                                                                                                                                                                                                                            |                                                                                                                        |
| gene (source not applicable)                                                                          | D. eugracilis                               | predicted HtsRC homolog                                              |                                                                                   |                                                                  |                                                                                  | XM_017050448.2                                                                                 |                                                                                                                                                                                                                                                                            |                                                                                                                        |
| gene (source not applicable)                                                                          | D. fuscipennis                              | predicted HtsRC homolog                                              |                                                                                   |                                                                  |                                                                                  | XM_017050448.2                                                                                 |                                                                                                                                                                                                                                                                            |                                                                                                                        |
| gene (source not applicable)                                                                          | D. grimshawi                                | predicted HtsRC homolog                                              |                                                                                   |                                                                  |                                                                                  | XM_016872118                                                                                   |                                                                                                                                                                                                                                                                            |                                                                                                                        |
| gene (source not applicable)                                                                          | D. hydei                                    | predicted HtsRC homolog                                              |                                                                                   |                                                                  |                                                                                  | XM_020511683                                                                                   |                                                                                                                                                                                                                                                                            |                                                                                                                        |
| gene (source not applicable)                                                                          | D. ikkawai                                  | predicted HtsRC homolog                                              |                                                                                   |                                                                  |                                                                                  | XM_017885381                                                                                   |                                                                                                                                                                                                                                                                            |                                                                                                                        |
| gene (source not applicable)                                                                          | D. melanogaster                             | HtsRC                                                                |                                                                                   |                                                                  |                                                                                  | XM_001688785                                                                                   |                                                                                                                                                                                                                                                                            |                                                                                                                        |
| gene (source not applicable)                                                                          | D. miranda                                  | predicted HtsRC homolog                                              |                                                                                   |                                                                  |                                                                                  | XM_017050448.2                                                                                 |                                                                                                                                                                                                                                                                            |                                                                                                                        |
| gene (source not applicable)                                                                          | D. mojavensis                               | predicted HtsRC homolog                                              |                                                                                   |                                                                  |                                                                                  | XM_00209844.1                                                                                  |                                                                                                                                                                                                                                                                            |                                                                                                                        |
| gene (source not applicable)                                                                          | D. novajoy                                  | predicted HtsRC homolog                                              |                                                                                   |                                                                  |                                                                                  | XM_020589809                                                                                   |                                                                                                                                                                                                                                                                            |                                                                                                                        |
| gene (source not applicable)                                                                          | D. persimilis                               | predicted HtsRC homolog                                              |                                                                                   |                                                                  |                                                                                  | XM_020589809                                                                                   |                                                                                                                                                                                                                                                                            |                                                                                                                        |
| gene (source not applicable)                                                                          | D. pseudoobscura                            | predicted HtsRC homolog                                              |                                                                                   |                                                                  |                                                                                  | XM_001688785                                                                                   |                                                                                                                                                                                                                                                                            |                                                                                                                        |
| gene (source not applicable)                                                                          | D. rhopaloea                                | predicted HtsRC homolog                                              |                                                                                   |                                                                  |                                                                                  | XM_017050448.2                                                                                 |                                                                                                                                                                                                                                                                            |                                                                                                                        |
| gene (source not applicable)                                                                          | D. sechellia                                | predicted HtsRC homolog                                              |                                                                                   |                                                                  |                                                                                  | XM_020589809                                                                                   |                                                                                                                                                                                                                                                                            |                                                                                                                        |
| gene (source not applicable)                                                                          | D. serrata                                  | predicted HtsRC homolog                                              |                                                                                   |                                                                  |                                                                                  | XM_020589809                                                                                   |                                                                                                                                                                                                                                                                            |                                                                                                                        |
| gene (source not applicable)                                                                          | D. simulans                                 | predicted HtsRC homolog                                              |                                                                                   |                                                                  |                                                                                  | XM_018166883                                                                                   |                                                                                                                                                                                                                                                                            |                                                                                                                        |
| gene (source not applicable)                                                                          | D. suzukii                                  | predicted HtsRC homolog                                              |                                                                                   |                                                                  |                                                                                  | XM_017050448.2                                                                                 |                                                                                                                                                                                                                                                                            |                                                                                                                        |
| gene (source not applicable)                                                                          | D. takahasi                                 | predicted HtsRC homolog                                              |                                                                                   |                                                                  |                                                                                  | XM_017050448.2                                                                                 |                                                                                                                                                                                                                                                                            |                                                                                                                        |
| gene (source not applicable)                                                                          | D. willisii                                 | predicted HtsRC homolog                                              |                                                                                   |                                                                  |                                                                                  | XM_020589809                                                                                   |                                                                                                                                                                                                                                                                            |                                                                                                                        |
| gene (source not applicable)                                                                          | D. willisii                                 | predicted HtsRC homolog                                              |                                                                                   |                                                                  |                                                                                  | XM_020589809                                                                                   |                                                                                                                                                                                                                                                                            |                                                                                                                        |
| gene (source not applicable)                                                                          | D. yakuba                                   | predicted HtsRC homolog                                              |                                                                                   |                                                                  |                                                                                  | XM_020589809                                                                                   |                                                                                                                                                                                                                                                                            |                                                                                                                        |
| gene (source not applicable)                                                                          | G. pallipes                                 | predicted HtsRC homolog                                              |                                                                                   |                                                                  |                                                                                  | XM_020589809                                                                                   |                                                                                                                                                                                                                                                                            |                                                                                                                        |
| gene (source not applicable)                                                                          | M. domestica                                | predicted HtsRC homolog                                              |                                                                                   |                                                                  |                                                                                  | XM_020589809                                                                                   |                                                                                                                                                                                                                                                                            |                                                                                                                        |

Reagent Table; Gerdes et al.

| Data type                                                                                              | Experimental species                        | Symbol/name used in publication                                     | Source – public                                                                   | Source – published                                               | Source – unpublished                                                             | Identifiers                                                                                    | New reagent                                                                                                                                                                                                                                                                | Comments                                                                                                               |
|--------------------------------------------------------------------------------------------------------|---------------------------------------------|---------------------------------------------------------------------|-----------------------------------------------------------------------------------|------------------------------------------------------------------|----------------------------------------------------------------------------------|------------------------------------------------------------------------------------------------|----------------------------------------------------------------------------------------------------------------------------------------------------------------------------------------------------------------------------------------------------------------------------|------------------------------------------------------------------------------------------------------------------------|
| Data type (mandatory). Duplicates rows as needed. Order is flexible, but row titles must be preserved. | Experimental species (mandatory, "NA" okay) | Symbol/name used in publication (mandatory)                         | Source – public (stock center, company, data repository) (one of D,E,F mandatory) | Source – published (PMID or this paper) (one of D,E,F mandatory) | Source – unpublished (description, incl. lab of origin) (one of D,E,F mandatory) | Identifiers (format as ID, source identifier) Separate multiple entries with semi-colon, space | New reagent (mandatory for new entities) Description, progenitor(s)                                                                                                                                                                                                        | Comments (optional) Genotypes, purpose of reagent, additional information                                              |
| antibody                                                                                               | NA                                          | HtsRC antibody                                                      | Developmental Studies Hybridoma Bank                                              |                                                                  |                                                                                  | RRID:AB_528289                                                                                 |                                                                                                                                                                                                                                                                            | Mouse monoclonal anti-Hts (HtsRC 4B); 1:10 dilution                                                                    |
| antibody                                                                                               | NA                                          | Flamin antibody                                                     |                                                                                   | PMID:10556087                                                    |                                                                                  | RRID:AB_2569614                                                                                |                                                                                                                                                                                                                                                                            | Rat polyclonal anti-Flamin (CFIL 7); 1:500 dilution                                                                    |
| antibody                                                                                               | NA                                          | Goat anti-mouse Alexa Fluor 633                                     | Thermo Fisher Scientific                                                          |                                                                  |                                                                                  | RRID:AB_2535719                                                                                |                                                                                                                                                                                                                                                                            | Goat anti-mouse IgG Secondary Antibody, Alexa Fluor 633; 1:500 dilution                                                |
| antibody                                                                                               | NA                                          | Goat anti-mouse IgG Secondary Antibody, Alexa Fluor 647; 1:500      | Thermo Fisher Scientific                                                          |                                                                  |                                                                                  | RRID:AB_2535804                                                                                |                                                                                                                                                                                                                                                                            | Goat anti-mouse IgG Secondary Antibody, Alexa Fluor 647; 1:500 dilution                                                |
| antibody                                                                                               | NA                                          | Goat anti-rat IgG Secondary Antibody, Alexa Fluor 488; 1:500        | Thermo Fisher Scientific                                                          |                                                                  |                                                                                  | RRID:AB_2534074                                                                                |                                                                                                                                                                                                                                                                            | Goat anti-rat IgG Secondary Antibody, Alexa Fluor 488; 1:500 dilution                                                  |
| antibody                                                                                               | NA                                          | TRITC-Phalloidin                                                    | Sigma-Aldrich                                                                     |                                                                  |                                                                                  | RRID:AB_2315148                                                                                |                                                                                                                                                                                                                                                                            | 1:200 dilution                                                                                                         |
| other                                                                                                  | NA                                          | DAPI stain                                                          |                                                                                   |                                                                  |                                                                                  |                                                                                                |                                                                                                                                                                                                                                                                            | 1:50,000 dilution                                                                                                      |
| genetic reagent (in whole organism)                                                                    | Drosophila melanogaster                     | Wild type; w <sup>1118</sup>                                        | Bloomington Drosophila Stock Center                                               |                                                                  |                                                                                  | RRID:BDSC_3605                                                                                 |                                                                                                                                                                                                                                                                            |                                                                                                                        |
| genetic reagent (in whole organism)                                                                    | Drosophila melanogaster                     | matGal4                                                             | Bloomington Drosophila Stock Center                                               |                                                                  |                                                                                  | BDSC_7063; FB:FBi0016914                                                                       |                                                                                                                                                                                                                                                                            | w <sup>1</sup> ; P[w <sup>+</sup> +mC]-mata <sup>ph4</sup> -GAL-VP16 V37                                               |
| genetic reagent (in whole organism)                                                                    | Drosophila melanogaster                     | hntGal4                                                             |                                                                                   | PMID:12814552                                                    |                                                                                  | FB:FBaI0130627                                                                                 |                                                                                                                                                                                                                                                                            | Gift from Mary Baylies lab                                                                                             |
| genetic reagent (in whole organism)                                                                    | Drosophila melanogaster                     | tubGal4                                                             | Bloomington Drosophila Stock Center                                               |                                                                  |                                                                                  | BDSC_5138; FB:FBi0012687                                                                       |                                                                                                                                                                                                                                                                            |                                                                                                                        |
| genetic reagent (in whole organism)                                                                    | Drosophila melanogaster                     | htr <sup>1</sup> P1; tubulinGal80 FRT40A; UAS-mCD8::GFP tubulinGal4 |                                                                                   | this paper                                                       |                                                                                  |                                                                                                | Component stocks/insertions: RRID:BDSC_5; FB:0002044; RRID:BDSC_5192; RRID:BDSC_30030;                                                                                                                                                                                     |                                                                                                                        |
| genetic reagent (in whole organism)                                                                    | Drosophila melanogaster                     | cher1                                                               |                                                                                   | PMID:9093858                                                     |                                                                                  | FB:FBaI0060473                                                                                 |                                                                                                                                                                                                                                                                            |                                                                                                                        |
| genetic reagent (in whole organism)                                                                    | Drosophila melanogaster                     | cherM113                                                            |                                                                                   |                                                                  | David Ish-Horowitz lab                                                           |                                                                                                | This work/Laboratory of D. Ish-Horowitz; mutations generated on FRT82 chromosome by EMS. Allele was generated as an extension of the work done in Hayashi et al 2014 but not published.                                                                                    | Gift of David Ish-Horowitz.                                                                                            |
| genetic reagent (in whole organism)                                                                    | Drosophila melanogaster                     | cherM919                                                            |                                                                                   |                                                                  | David Ish-Horowitz lab                                                           |                                                                                                | This work/Laboratory of D. Ish-Horowitz; mutations generated on FRT82 chromosome by EMS. Allele was generated as an extension of the work done in Hayashi et al 2014 but not published.                                                                                    | Gift of David Ish-Horowitz.                                                                                            |
| genetic reagent (in whole organism)                                                                    | Drosophila melanogaster                     | hst175fs                                                            |                                                                                   | PMID:30559276                                                    |                                                                                  | FB:FBaI0345602                                                                                 |                                                                                                                                                                                                                                                                            |                                                                                                                        |
| genetic reagent (in whole organism)                                                                    | Drosophila melanogaster                     | htrR913s                                                            |                                                                                   | PMID:30559276                                                    |                                                                                  | FB:FBaI0345601                                                                                 |                                                                                                                                                                                                                                                                            |                                                                                                                        |
| genetic reagent (in whole organism)                                                                    | Drosophila melanogaster                     | UASp-mCherry                                                        |                                                                                   | PMID:22428051                                                    |                                                                                  | FB:FBaI0284922                                                                                 |                                                                                                                                                                                                                                                                            |                                                                                                                        |
| genetic reagent (in whole organism)                                                                    | Drosophila melanogaster                     | UASp-TAPmCherry-Kelch                                               |                                                                                   | PMID:26384358                                                    |                                                                                  | FB:FBaI0283122                                                                                 |                                                                                                                                                                                                                                                                            |                                                                                                                        |
| genetic reagent (in whole organism)                                                                    | Drosophila melanogaster                     | UASp-Kelch-deltaNTR                                                 |                                                                                   | PMID:30559276                                                    |                                                                                  | FB:FBaI0345599                                                                                 |                                                                                                                                                                                                                                                                            |                                                                                                                        |
| genetic reagent (in whole organism)                                                                    | Drosophila melanogaster                     | tubulin-ovhts-hsN4UTRdelta100                                       |                                                                                   | PMID:24677508                                                    |                                                                                  | FB:FBaI0301360                                                                                 |                                                                                                                                                                                                                                                                            | Tubulin direct drive construct missing region of 3'UTR required for Swallow dependent localization at at oocyte cortex |
| genetic reagent (in whole organism)                                                                    | Drosophila melanogaster                     | UASH-Ovhts::GFP-hsN4UTR                                             |                                                                                   | PMID:17215303                                                    |                                                                                  | FB:FBaI0212988                                                                                 |                                                                                                                                                                                                                                                                            | Contains UAS promoter with ovhts/hisN4 3'UTR sequence in place of typical 3'UTR                                        |
| genetic reagent (in whole organism)                                                                    | Drosophila melanogaster                     | UASH-Ovhts::GFP-K18UTR                                              |                                                                                   | this paper                                                       |                                                                                  |                                                                                                | ovhts::GFP PCR amplified from UASH-ovhts::GFP-hsN4UTR construct and inserted into pDONR201; Insert was then swapped into pPW-attB using Gateway recombination. Resulting plasmid was transformed into a strain containing the attP2 landing site on chromosome III (88A4). |                                                                                                                        |
| genetic reagent (in whole organism)                                                                    | Drosophila melanogaster                     | UASH-Ovhts::V5::APEX-hsN4UTR                                        |                                                                                   | this paper                                                       |                                                                                  |                                                                                                | APEX was PCR amplified from pDNA3-mito-APEX using a primer containing V5 tag sequence. Resulting PCR product was restriction cloned into UASH-ovhts::GFP (hsN43'UTR) in frame in the place of GFP. Plasmid was inserted using p-element insertion                          |                                                                                                                        |
| genetic reagent (in whole organism)                                                                    | Drosophila melanogaster                     | hts Df. w <sup>1118</sup> ; Df(2R)BSC135/CyO                        | Bloomington Drosophila Stock Center                                               |                                                                  |                                                                                  | BDSC_9423; FB:FBaI0044866                                                                      |                                                                                                                                                                                                                                                                            |                                                                                                                        |
| genetic reagent (in whole organism)                                                                    | Drosophila melanogaster                     | cher-M07480-GFSTF.0                                                 | Bloomington Drosophila Stock Center                                               |                                                                  |                                                                                  | BDSC_60261; FB:FBaI0314454                                                                     |                                                                                                                                                                                                                                                                            |                                                                                                                        |
| genetic reagent (in whole organism)                                                                    | Drosophila melanogaster                     | ArpC1-Q25SD FRT40A                                                  | Bloomington Drosophila Stock Center                                               |                                                                  |                                                                                  | BDSC_9137; FB:FBaI0135790                                                                      |                                                                                                                                                                                                                                                                            |                                                                                                                        |
| genetic reagent (in whole organism)                                                                    | Drosophila melanogaster                     | ArpC4-SH1036 FRT40A                                                 | Bloomington Drosophila Stock Center                                               |                                                                  |                                                                                  | BDSC_29488; FB:FBaI0321477                                                                     |                                                                                                                                                                                                                                                                            |                                                                                                                        |
| genetic reagent (in whole organism)                                                                    | Drosophila melanogaster                     | isogenized neoFRT40A                                                |                                                                                   | PMID:8404527                                                     |                                                                                  | FB:FBi0002071                                                                                  |                                                                                                                                                                                                                                                                            | Gift of Tian Xu                                                                                                        |
| gene (source not applicable)                                                                           | Drosophila melanogaster                     | hts                                                                 | NA                                                                                | NA                                                               | NA                                                                               | FB:FBgn0263391                                                                                 |                                                                                                                                                                                                                                                                            |                                                                                                                        |
| gene (source not applicable)                                                                           | Drosophila melanogaster                     | cheerio                                                             | NA                                                                                | NA                                                               | NA                                                                               | FB:FBgn0014141                                                                                 |                                                                                                                                                                                                                                                                            |                                                                                                                        |
| gene (source not applicable)                                                                           | Drosophila melanogaster                     | kelch                                                               | NA                                                                                | NA                                                               | NA                                                                               | FB:FBgn0001301                                                                                 |                                                                                                                                                                                                                                                                            |                                                                                                                        |
| gene (source not applicable)                                                                           | Drosophila melanogaster                     | ArpC1                                                               | NA                                                                                | NA                                                               | NA                                                                               | FB:FBgn0001961                                                                                 |                                                                                                                                                                                                                                                                            |                                                                                                                        |
| gene (source not applicable)                                                                           | Drosophila melanogaster                     | ArpC4                                                               | NA                                                                                | NA                                                               | NA                                                                               | FB:FBgn0284255                                                                                 |                                                                                                                                                                                                                                                                            |                                                                                                                        |
| software, algorithm                                                                                    | NA                                          | ImageJ/FIJI                                                         | NIH                                                                               |                                                                  |                                                                                  |                                                                                                |                                                                                                                                                                                                                                                                            | <a href="https://fiji.sc/">https://fiji.sc/</a>                                                                        |
| software, algorithm                                                                                    | NA                                          | Imaris 9.3                                                          | Bitplane                                                                          |                                                                  |                                                                                  |                                                                                                |                                                                                                                                                                                                                                                                            | <a href="https://www.bitplane.com/">https://www.bitplane.com/</a>                                                      |
| software, algorithm                                                                                    | NA                                          | Prism 8                                                             | GraphPad                                                                          |                                                                  |                                                                                  |                                                                                                |                                                                                                                                                                                                                                                                            | <a href="https://www.graphpad.com/scientificsoftware/prism/">https://www.graphpad.com/scientificsoftware/prism/</a>    |
| software, algorithm                                                                                    | NA                                          | Jalview                                                             |                                                                                   | PMID:19151095                                                    |                                                                                  |                                                                                                |                                                                                                                                                                                                                                                                            | <a href="http://www.jalview.org/">http://www.jalview.org/</a>                                                          |
| software, algorithm                                                                                    | NA                                          | Jupyter Notebook                                                    | Anaconda                                                                          |                                                                  |                                                                                  |                                                                                                |                                                                                                                                                                                                                                                                            | <a href="http://www.anaconda.com/">http://www.anaconda.com/</a>                                                        |
| software, algorithm                                                                                    | NA                                          | NCBI Blast                                                          | NIH                                                                               |                                                                  |                                                                                  |                                                                                                |                                                                                                                                                                                                                                                                            | <a href="https://blast.ncbi.nlm.nih.gov/">https://blast.ncbi.nlm.nih.gov/</a>                                          |
| software, algorithm                                                                                    | NA                                          | Vectorbase                                                          |                                                                                   | PMID:25510499                                                    |                                                                                  |                                                                                                |                                                                                                                                                                                                                                                                            | <a href="https://www.vectorbase.org/blast">https://www.vectorbase.org/blast</a>                                        |
| software, algorithm                                                                                    | NA                                          | SPOT-Disorder-Single application                                    |                                                                                   | PMID:30395465                                                    |                                                                                  |                                                                                                |                                                                                                                                                                                                                                                                            |                                                                                                                        |
| software, algorithm                                                                                    | NA                                          | MetaDisorder (GeneSilo)                                             |                                                                                   | PMID:22624656                                                    |                                                                                  |                                                                                                |                                                                                                                                                                                                                                                                            | <a href="http://genesilo.clinicaldisorder/">http://genesilo.clinicaldisorder/</a>                                      |
| recombinant DNA reagent                                                                                | NA                                          | pUASH-ovhts-GFP                                                     |                                                                                   | PMID:17215303                                                    |                                                                                  |                                                                                                |                                                                                                                                                                                                                                                                            |                                                                                                                        |
| recombinant DNA reagent                                                                                | NA                                          | pCDNA3-mito-APEX                                                    |                                                                                   | PMID:23371551                                                    |                                                                                  |                                                                                                | Addgene Plasmid #42607                                                                                                                                                                                                                                                     |                                                                                                                        |
| recombinant DNA reagent                                                                                | NA                                          | pPW-attB (gateway vector)                                           |                                                                                   |                                                                  | Lab of Michael Buszczak, UT Southwestern                                         |                                                                                                |                                                                                                                                                                                                                                                                            |                                                                                                                        |
| recombinant DNA reagent                                                                                | NA                                          | pDONR201 (gateway vector)                                           | Thermo Fisher Scientific                                                          |                                                                  |                                                                                  |                                                                                                |                                                                                                                                                                                                                                                                            |                                                                                                                        |
| gene (source not applicable)                                                                           | D. arizonae                                 | predicted HtsRC homolog                                             |                                                                                   |                                                                  |                                                                                  | XM_018011272                                                                                   |                                                                                                                                                                                                                                                                            |                                                                                                                        |
| gene (source not applicable)                                                                           | D. biarmipes                                | predicted HtsRC homolog                                             |                                                                                   |                                                                  |                                                                                  | XM_017057880                                                                                   |                                                                                                                                                                                                                                                                            |                                                                                                                        |
| gene (source not applicable)                                                                           | D. bipunctata                               | predicted HtsRC homolog                                             |                                                                                   |                                                                  |                                                                                  | XM_017204448.2                                                                                 |                                                                                                                                                                                                                                                                            |                                                                                                                        |
| gene (source not applicable)                                                                           | D. busckii                                  | predicted HtsRC homolog                                             |                                                                                   |                                                                  |                                                                                  | XM_017202483.2                                                                                 |                                                                                                                                                                                                                                                                            |                                                                                                                        |
| gene (source not applicable)                                                                           | D. elegans                                  | predicted HtsRC homolog                                             |                                                                                   |                                                                  |                                                                                  | XM_017272506.1                                                                                 |                                                                                                                                                                                                                                                                            |                                                                                                                        |
| gene (source not applicable)                                                                           | D. erecta                                   | predicted HtsRC homolog                                             |                                                                                   |                                                                  |                                                                                  | XM_018166883                                                                                   |                                                                                                                                                                                                                                                                            |                                                                                                                        |
| gene (source not applicable)                                                                           | D. eugracilis                               | predicted HtsRC homolog                                             |                                                                                   |                                                                  |                                                                                  | XM_017272803.2                                                                                 |                                                                                                                                                                                                                                                                            |                                                                                                                        |
| gene (source not applicable)                                                                           | D. foushiana                                | predicted HtsRC homolog                                             |                                                                                   |                                                                  |                                                                                  | XM_017284820.3                                                                                 |                                                                                                                                                                                                                                                                            |                                                                                                                        |
| gene (source not applicable)                                                                           | D. grimshawi                                | predicted HtsRC homolog                                             |                                                                                   |                                                                  |                                                                                  | XM_016872116                                                                                   |                                                                                                                                                                                                                                                                            |                                                                                                                        |
| gene (source not applicable)                                                                           | D. hydei                                    | predicted HtsRC homolog                                             |                                                                                   |                                                                  |                                                                                  | XM_020511683                                                                                   |                                                                                                                                                                                                                                                                            |                                                                                                                        |
| gene (source not applicable)                                                                           | D. ikkawai                                  | predicted HtsRC homolog                                             |                                                                                   |                                                                  |                                                                                  | XM_017388381                                                                                   |                                                                                                                                                                                                                                                                            |                                                                                                                        |
| gene (source not applicable)                                                                           | D. melanogaster                             | HtsRC                                                               |                                                                                   |                                                                  |                                                                                  | XM_001688785                                                                                   |                                                                                                                                                                                                                                                                            |                                                                                                                        |
| gene (source not applicable)                                                                           | D. miranda                                  | predicted HtsRC homolog                                             |                                                                                   |                                                                  |                                                                                  | XM_017221055.1                                                                                 |                                                                                                                                                                                                                                                                            |                                                                                                                        |
| gene (source not applicable)                                                                           | D. mojavensis                               | predicted HtsRC homolog                                             |                                                                                   |                                                                  |                                                                                  | XM_002709844.1                                                                                 |                                                                                                                                                                                                                                                                            |                                                                                                                        |
| gene (source not applicable)                                                                           | D. novojoki                                 | predicted HtsRC homolog                                             |                                                                                   |                                                                  |                                                                                  | XM_020389860                                                                                   |                                                                                                                                                                                                                                                                            |                                                                                                                        |
| gene (source not applicable)                                                                           | D. persimilis                               | predicted HtsRC homolog                                             |                                                                                   |                                                                  |                                                                                  | XM_020315197                                                                                   |                                                                                                                                                                                                                                                                            |                                                                                                                        |
| gene (source not applicable)                                                                           | D. pseudoobscura                            | predicted HtsRC homolog                                             |                                                                                   |                                                                  |                                                                                  | XM_001688204                                                                                   |                                                                                                                                                                                                                                                                            |                                                                                                                        |
| gene (source not applicable)                                                                           | D. rhopaloea                                | predicted HtsRC homolog                                             |                                                                                   |                                                                  |                                                                                  | XM_017222787                                                                                   |                                                                                                                                                                                                                                                                            |                                                                                                                        |
| gene (source not applicable)                                                                           | D. sechellia                                | predicted HtsRC homolog                                             |                                                                                   |                                                                  |                                                                                  | XM_020344448.1                                                                                 |                                                                                                                                                                                                                                                                            |                                                                                                                        |
| gene (source not applicable)                                                                           | D. serrata                                  | predicted HtsRC homolog                                             |                                                                                   |                                                                  |                                                                                  | XM_020344448.1                                                                                 |                                                                                                                                                                                                                                                                            |                                                                                                                        |
| gene (source not applicable)                                                                           | D. simulans                                 | predicted HtsRC homolog                                             |                                                                                   |                                                                  |                                                                                  | XM_016815886.1                                                                                 |                                                                                                                                                                                                                                                                            |                                                                                                                        |
| gene (source not applicable)                                                                           | D. suzukii                                  | predicted HtsRC homolog                                             |                                                                                   |                                                                  |                                                                                  | XM_017272841                                                                                   |                                                                                                                                                                                                                                                                            |                                                                                                                        |
| gene (source not applicable)                                                                           | D. takahasi                                 | predicted HtsRC homolog                                             |                                                                                   |                                                                  |                                                                                  | XM_017145521                                                                                   |                                                                                                                                                                                                                                                                            |                                                                                                                        |
| gene (source not applicable)                                                                           | D. willis                                   | predicted HtsRC homolog                                             |                                                                                   |                                                                  |                                                                                  | XM_020315197                                                                                   |                                                                                                                                                                                                                                                                            |                                                                                                                        |
| gene (source not applicable)                                                                           | D. willistoni                               | predicted HtsRC homolog                                             |                                                                                   |                                                                  |                                                                                  | XM_020173252                                                                                   |                                                                                                                                                                                                                                                                            |                                                                                                                        |
| gene (source not applicable)                                                                           | D. yakuba                                   | predicted HtsRC homolog                                             |                                                                                   |                                                                  |                                                                                  | XM_016182287                                                                                   |                                                                                                                                                                                                                                                                            |                                                                                                                        |
| gene (source not applicable)                                                                           | G. pallipes                                 | predicted HtsRC homolog                                             |                                                                                   |                                                                  |                                                                                  | GP0028402-RA; GP0028401-RA                                                                     |                                                                                                                                                                                                                                                                            |                                                                                                                        |
| gene (source not applicable)                                                                           | M. domestica                                | predicted HtsRC homolog                                             |                                                                                   |                                                                  |                                                                                  | XP_012246254.1; XM_012246252.2                                                                 |                                                                                                                                                                                                                                                                            |                                                                                                                        |
